# Supplementary material for: Rationally Improving Doramectin Production in Industrial Streptomyces avermitilis Strains
Source: MDPI journal article supplement (doi:10.3390/bioengineering10060739), 2023-06-20
Supplement: s1 [file s1]

# Supplementary materials

## Rationally improving doramectin production in industrial *Streptomyces avermitilis* strains

Fujun Dang<sup>1</sup>, Qingyu Xu<sup>1</sup>, Zhongjun Qin<sup>1</sup> and Haiyang Xia<sup>1,2,\*</sup>

<sup>1</sup> Key Laboratory of Synthetic Biology, the Center of Excellent Plant Molecular Sciences, the Chinese Academy of Sciences, Shanghai, 200032

<sup>2</sup> Institute of Biopharmaceuticals, Taizhou University, Taizhou, 317000, China

\* Correspondence: hyxia@tzc.edu.cn.

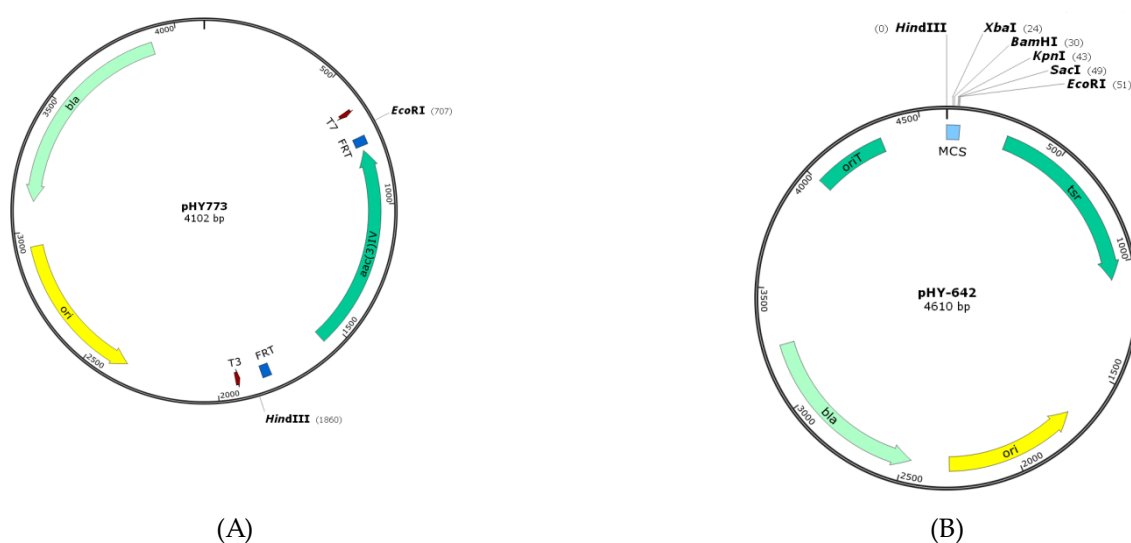

**Figure S1.** Physical maps of plasmids pHY773 and pHY-642. (A), pHY773 containing the FRT-*aac(3)IV*-FRT cassette. (B), pHY-642 can be used as a shuttle vector for gene deletion in *Streptomyces*.

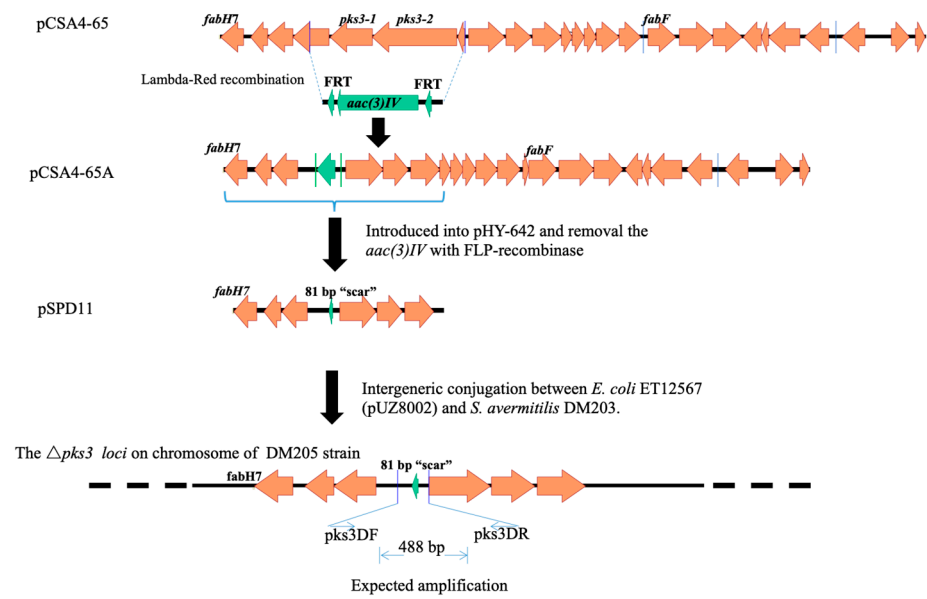

(A)

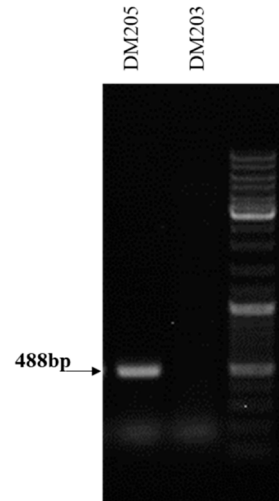

(B)

**Figure S2.** Markerless deletion of the *pks3* cluster from *S. avermitilis* DM203. (A), Schematic strategy for markerless deletion of the *pks3* cluster from strain DM203. Plasmid pCSA4-65A resulted from replacement of the *pks3* cluster with the FRT-*aac(3)IV*-FRT cassette on cosmid pCSA4-65 by lambda Red recombination. The fragment contains the FRT-*aac(3)IV*-FRT cassette introduced into pHY-642. The *aac(3)IV* on the resulting plasmid was cleaved by FLP-recombinase to generate pSPD11. Plasmid pSPD11 was introduced into strain DM203 by intergeneric conjugation. The double-crossover strains were selected by restreaking conjugants to antibiotic-free ISP2 medium. Clones with loss of thiostrepton resistance were verified by PCR amplification with the pks3DF and pks3DR primer pair. (B), PCR verification of *pks3* deletion in DM205 with the pks3DF and pks3DR primer pair.

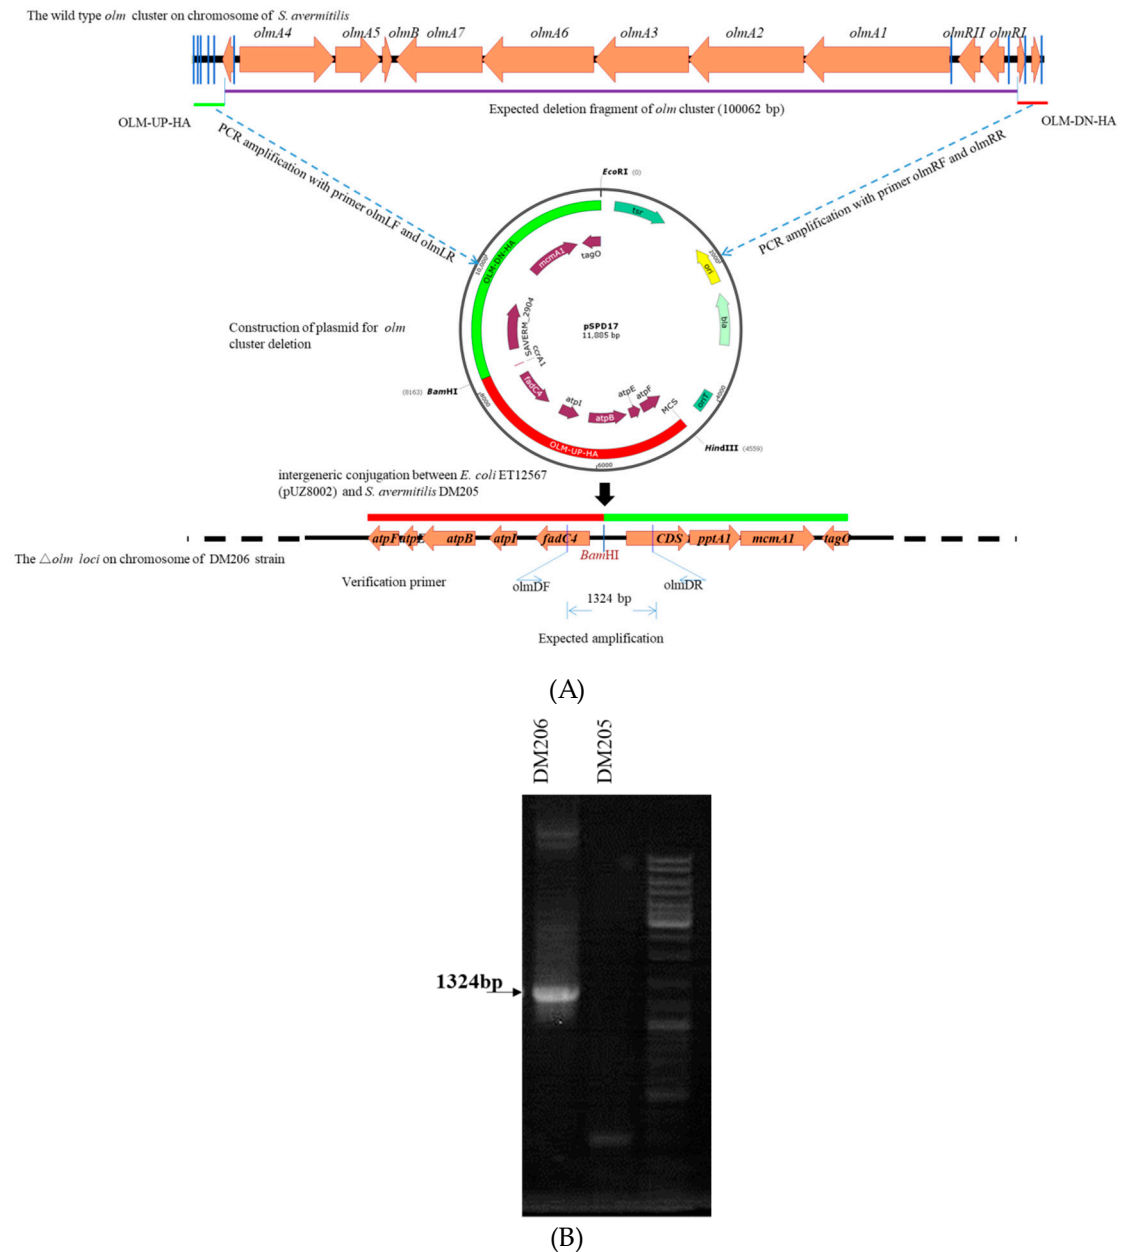

**Figure S3.** Schematic strategy for markerless deletion of the *olm* cluster from *S. avermitilis* DM205. (A), Diagram of the construction of pSPD17 for deleting the *olm* cluster. The upstream and downstream homologous arms were amplified and introduced into pHY-642 to generate pSPD17. Plasmid pSPD17 was introduced into strain DM205 by intergeneric conjugation. The double-crossover strains were selected by restreaking conjugants to antibiotic-free ISP2 medium. Clones with loss of thiostrepton resistance were verified by PCR amplification with the *olm*DF and *olm*DR primer pair. (B), PCR verification of *olm* deletion in DM206 with the *olm*DF and *olm*DR primer pair.

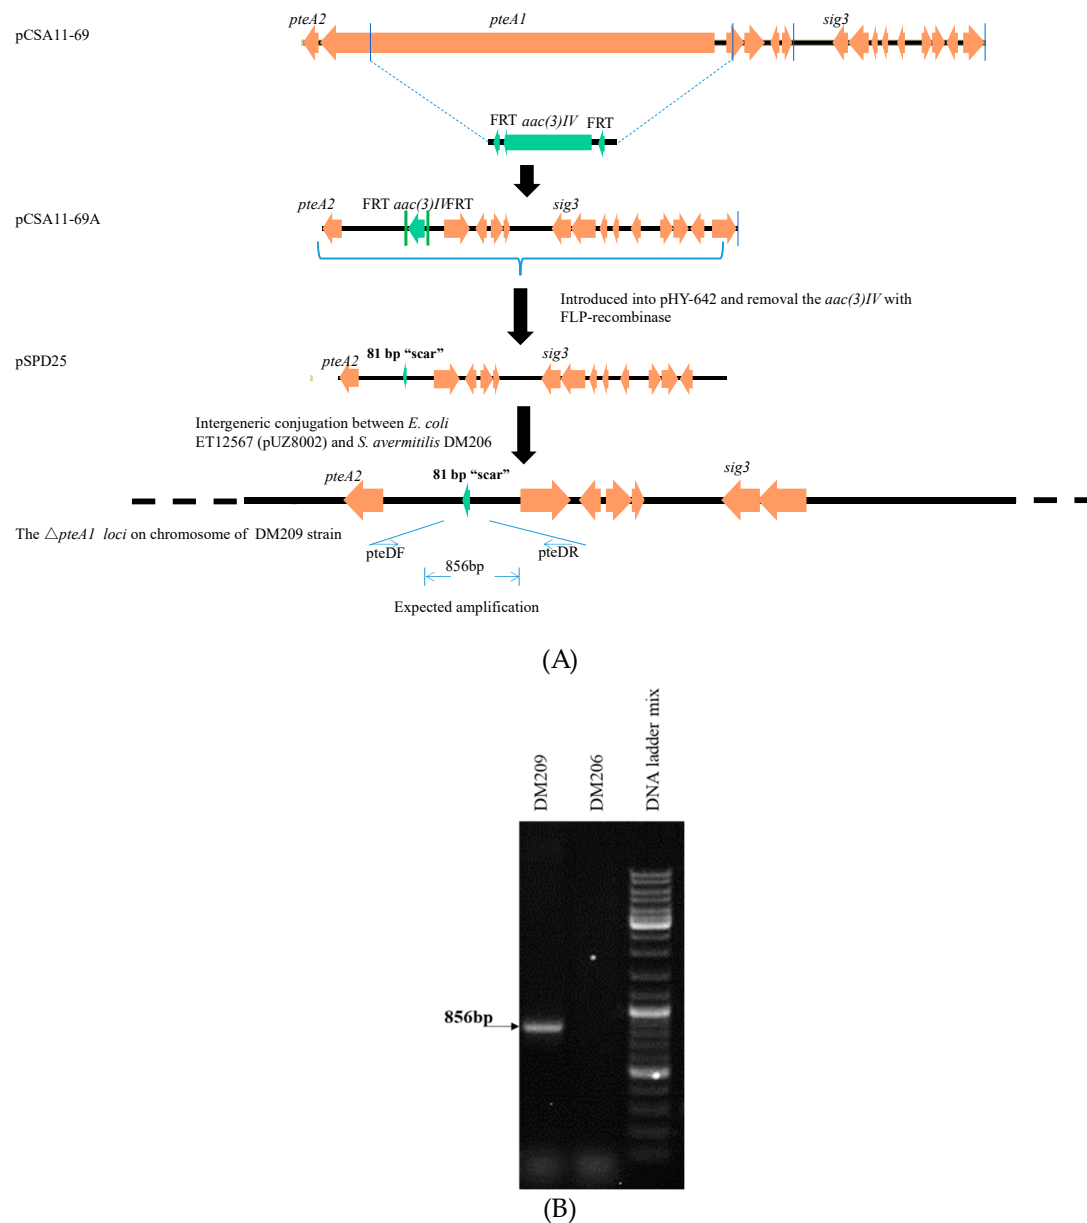

**Figure S4.** Markerless deletion of a partial *pte* cluster from *S. avermitilis* DM206. (A), Schematic strategy for markerless deletion of the *pte* cluster from strain DM206. Plasmid pCSA11-69A resulted from the replacement of a partial *pte* cluster with the FRT-*aac(3)IV*-FRT cassette on cosmid pCSA4-65 by lambda Red recombination. The fragment contains the FRT-*aac(3)IV*-FRT cassette introduced into pHY-642. The *aac(3)IV* cassette on the resulting plasmid was cleaved by FLP-recombinase to generate pSPD25. Plasmid pSPD25 was introduced into strain DM206 by intergeneric conjugation. The double-crossover strains were selected by restreaking conjugants to antibiotic-free ISP2 medium. Clones with loss of thiostrepton resistance was verified by PCR amplification with the *pte*DF and *pte*DR primer pair. (B), PCR verification of *pte* deletion in DM209 with the *pte*DF and *pte*DR primer pair.

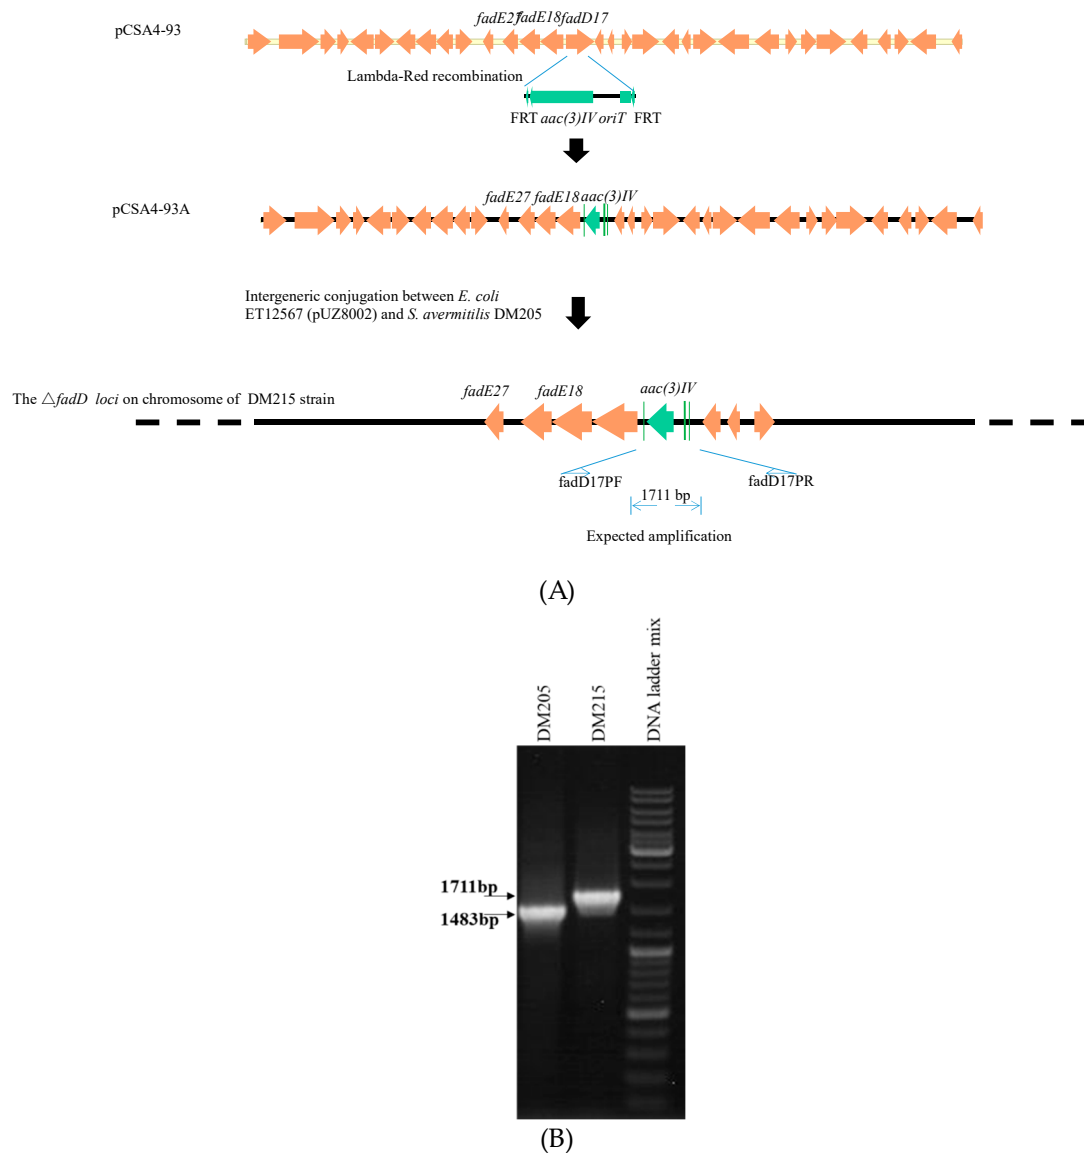

**Figure S5.** Disruption of *fadD17* from *S. avermitilis* DM205. (A), PCR-targeting *fadD* from strain DM205. Plasmid pCSA4-93A resulted from the replacement of *fadD17* with the FRT-*aac(3)IV*-oriT-FRT cassette on cosmid pCSA4-65 by lambda Red recombination. Plasmid pCSA4-93A was introduced into strain DM205 by intergeneric conjugation. The double-crossover strains were screened out by selection of apramycin-resistant and kanamycin-sensitive conjugants. The positive clones were verified by PCR amplification with the *fadD17PF* and *fadD17PR* primer pair. (B), PCR verification of *fadD17* deletion in DM215 with the *fadD17PF* and *fadD17PR* primer pair.

**Table S1.** Putative CoA ligase-encoding genes in *Streptomyces avermitilis*.

| ID                     | Start          | End            | Definition                                                     |
|------------------------|----------------|----------------|----------------------------------------------------------------|
| SAV_377                | 445913         | 447400         | putative acyl-CoA synthetase, long-chain fatty acid:CoA ligase |
| SAV_605                | 760552         | 758996         | putative acyl-CoA synthetase, long-chain fatty acid:CoA ligase |
| SAV_1104               | 1388246        | 1390171        | putative acyl-CoA synthetase, long-chain fatty acid:CoA ligase |
| SAV_1246               | 1544829        | 1546583        | putative acyl-CoA synthetase, long-chain fatty acid:CoA ligase |
| SAV_1257               | 1559656        | 1560951        | putative phenylacetate:CoA ligase                              |
| SAV_1258               | 1562499        | 1561000        | putative acyl-CoA synthetase, long-chain fatty acid:CoA ligase |
| SAV_1259               | 1564346        | 1562796        | putative acyl-CoA synthetase, long-chain fatty acid:CoA ligase |
| SAV_1603               | 1970811        | 1969300        | putative acyl-CoA synthetase, long-chain fatty acid:CoA ligase |
| SAV_1627               | 1996963        | 1995767        | putative 2-amino-3-oxobutyrate:CoA ligase                      |
| SAV_1848               | 2264965        | 2266791        | putative acyl-CoA synthetase, long-chain fatty acid:CoA ligase |
| SAV_3330               | 4145296        | 4144421        | putative biotin apoprotein ligase                              |
| SAV_3416               | 4238429        | 4237848        | putative secreted protein                                      |
| SAV_3674               | 4548308        | 4548931        | putative ligase                                                |
| SAV_3806               | 4710123        | 4708540        | putative acyl-CoA synthetase, fatty acid:CoA ligase            |
| <b>FadD (SAV_3841)</b> | <b>4745600</b> | <b>4747099</b> | <b>putative cyclohex-1-ene-1-carboxylate:CoA ligase</b>        |
| SAV_3864               | 4773500        | 4771926        | putative 4-coumarate:CoA ligase                                |
| SAV_4206               | 5162486        | 5160810        | putative acyl-CoA synthetase, long-chain fatty acid:CoA ligase |
| SAV_4818               | 5858175        | 5860091        | putative acyl-CoA synthetase, long-chain fatty acid:CoA ligase |
| SAV_5225               | 6333369        | 6335009        | putative acyl-CoA synthetase, long-chain fatty acid:CoA ligase |
| SAV_5562               | 6727208        | 6729118        | putative acyl-CoA synthetase, long-chain fatty acid:CoA ligase |
| SAV_5723               | 6924728        | 6923259        | putative acyl-CoA synthetase, long-chain fatty acid:CoA ligase |
| SAV_6069               | 7307315        | 7305519        | putative acyl-CoA synthetase, long-chain fatty acid:CoA ligase |
| SAV_6612               | 7911728        | 7913395        | putative acyl-CoA synthetase, long-chain fatty acid:CoA ligase |
